# Supplementary material for: Grain boundary-mediated nanopores in molybdenum disulfide grown by chemical vapor deposition
Source: Royal Society of Chemistry journal article supplement (doi:10.1039/c6nr08958e), 2016-12-26
Supplement: c6nr08958e1.pdf [file c6nr08958e1.pdf]

## Supplementary Information for “Grain boundary-mediated nanopores in molybdenum disulfide grown by chemical vapor deposition”

### Atomic force microscopy and Raman spectroscopy analysis

A Raman spectrum indicating the in-plane  $E_{2g}^1$  and out-of-plane  $A_{1g}$  modes of  $\text{MoS}_2$  is shown in Supplementary Figure 1a. The peak positions of the  $E_{2g}^1$  and  $A_{1g}$  Raman modes are ca.  $382\text{ cm}^{-1}$  and ca.  $405\text{ cm}^{-1}$ , which confirm<sup>40,41</sup> the formation of BL  $\text{MoS}_2$  (Ref. <sup>42</sup>). The 2LA(M) Raman peak is also observed at the position of ca.  $452\text{ cm}^{-1}$  (Refs. <sup>43,44</sup>). Supplementary Figure 1b shows a tapping mode AFM topography image of  $\text{MoS}_2$  islands on top of a SiN/Si chip with multiple holes confirming that  $\text{MoS}_2$  grains have triangular shapes.

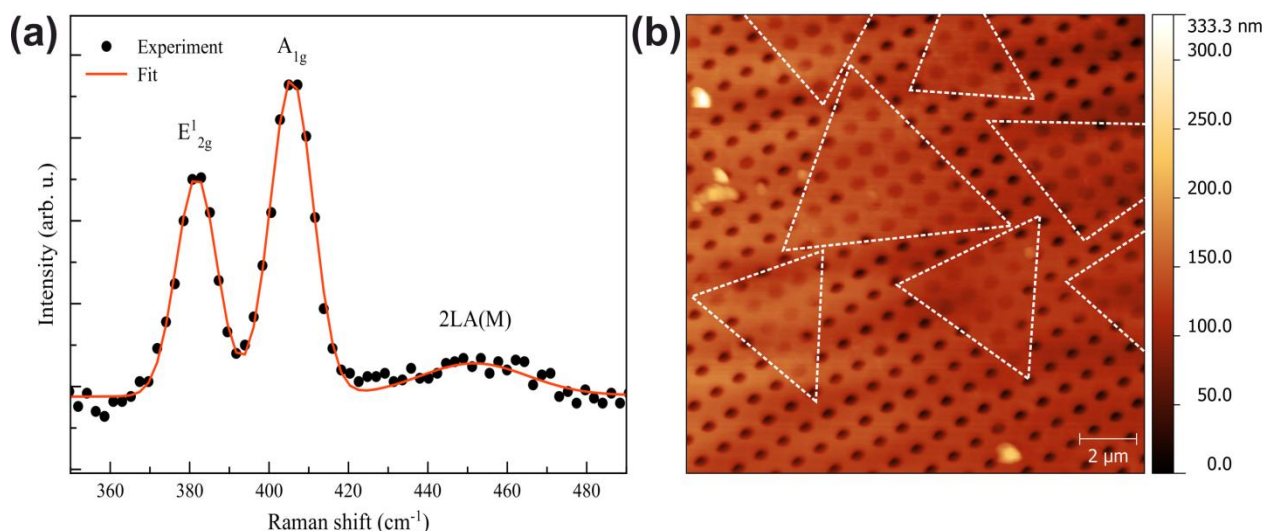

**Supplementary Figure 1.** (a) Raman spectrum of suspended  $\text{MoS}_2$  showing in-plane  $E_{2g}^1$  and out-of-plane  $A_{1g}$  Raman modes and the 2LA(M) peak measured with a 473 nm laser. (b) AFM topography image of four well-separated  $\text{MoS}_2$  grains (highlighted with white lines) on a SiN/Si chip with multiple holes.

### Pores between MoS<sub>2</sub> grains

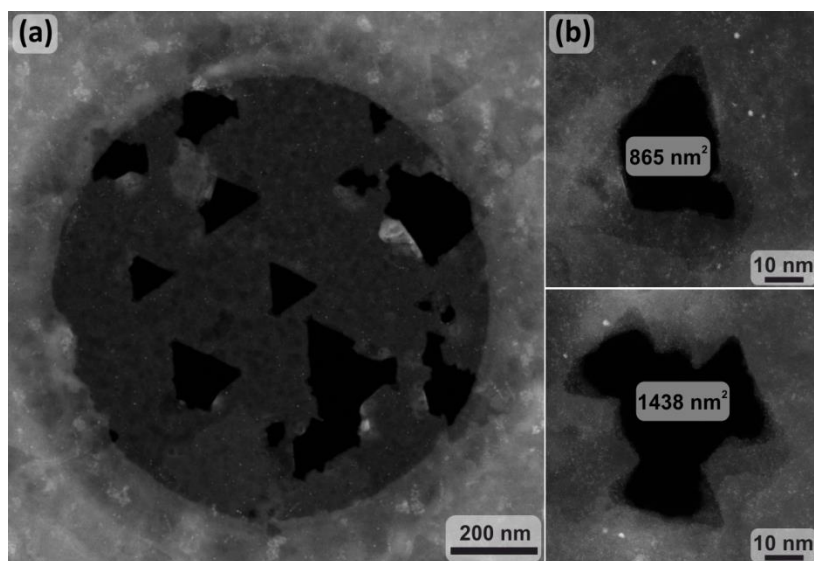

**Supplementary Figure 2.** HAADF-STEM images showing triangular holes between MoS<sub>2</sub> grains after prematurely terminated CVD growth.

### Atomic structure of the dislocation core

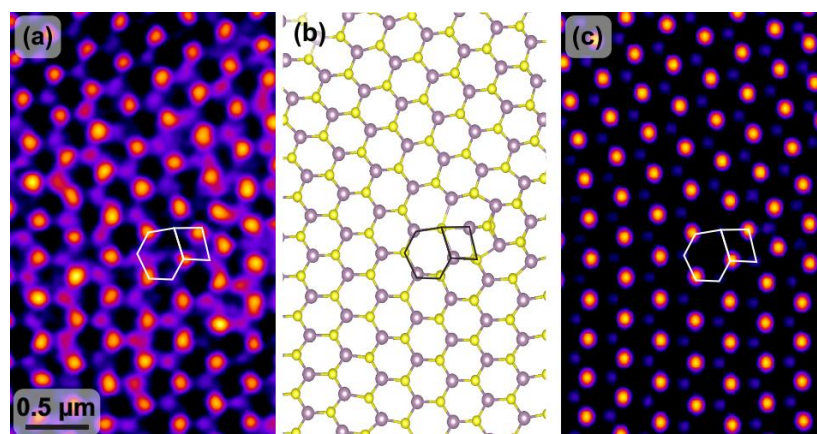

**Supplementary Figure 3.** (a) HAADF-STEM image showing the GB of ML MoS<sub>2</sub>. (b) An atomistic model of the GB, relaxed by DFT, with a 4|6 dislocation. (c) Simulated HAADF-STEM image of the relaxed model in (b).

## Edge dislocation models

The strain of an edge dislocation can be described by the Peierls–Nabarro (PN) and the Foreman (FM) models. These models are fitted to our experimental strain distribution around a dislocation core obtained by GPA. The strain of an edge dislocation along the  $x$  direction is given by PN and FM models as

$$\varepsilon_{xx}^{PN} = -\frac{b}{\pi} \left[ \frac{(1-\nu)y}{4(1-\nu)^2x^2+y^2} \right] \quad (1)$$

and

$$\varepsilon_{xx}^{FM} = -\frac{b(1-\nu)}{\pi} \left[ \frac{4(1-\nu)^2yx^2+(2a^3-a^2)y^3}{(4(1-\nu)^2x^2+a^2y^2)^2} \right]. \quad (2)$$

Here  $b$  is the magnitude of Burger vector,  $\nu$  the Poisson's ratio (0.25 for ML MoS<sub>2</sub>)<sup>46</sup>, and  $a$  a fitting parameter. In case of  $a = 1$ , FM model is equal to PN model.

## Unfiltered version of Figure 5a

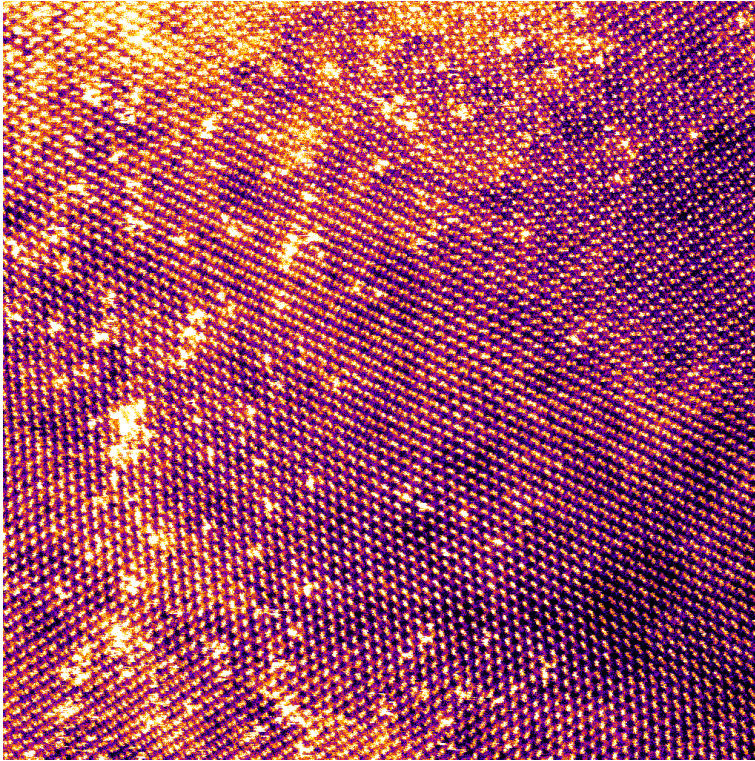

**Supplementary Figure 4.**  
Unprocessed HAADF-STEM image  
of bilayer MoS<sub>2</sub>.



## Analysis of the sample thickness and rippling of bilayers

In order to confirm the thicknesses of the studied films, we made image simulations for ML and BL MoS<sub>2</sub> and compared the intensity profiles of simulated and experimental images, as shown in Supplementary Figure 5. The thickness of layers can also be measured by diffraction experiments (Supplementary Figure 6) because the intensity ratio within the  $\{\bar{1}100\}$  family in diffraction patterns of ML and BL MoS<sub>2</sub> gives information on layer thicknesses<sup>45</sup>. The intensity ratios in the  $\{\bar{1}100\}$  family of ML MoS<sub>2</sub> show no tilt or ripple in ML MoS<sub>2</sub>. In contrast, the intensity ratios for BL MoS<sub>2</sub> are in many cases not  $\sim 1$  like they should be for a flat BL structure<sup>45</sup>. This indicates rippling in one or both of the layers since it can cause such intensity variations<sup>45</sup>.

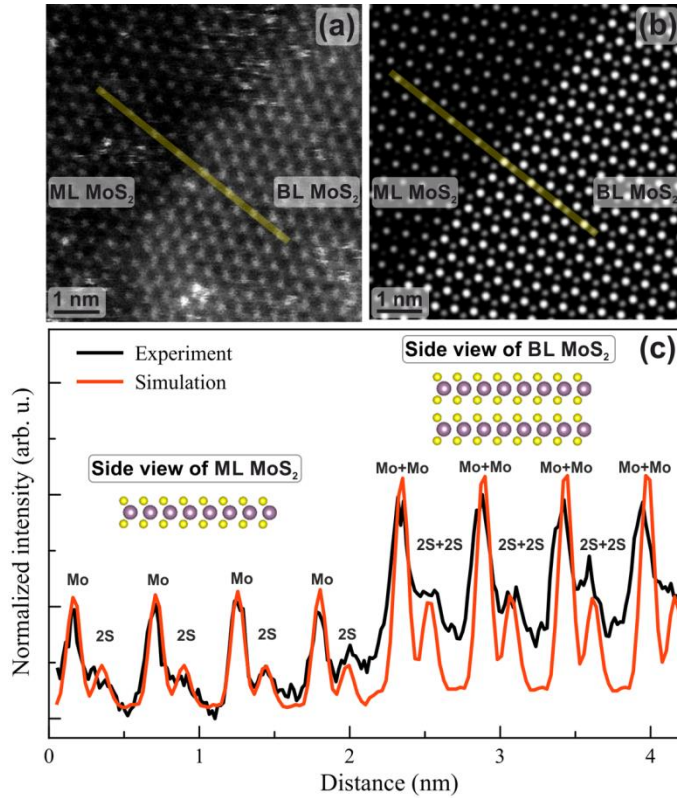

**Supplementary Figure 5.** (a) HAADF-STEM image showing ML and BL MoS<sub>2</sub>. (b) The corresponding simulated HAADF image. (c) Intensity profiles along the yellow lines on experimental and simulated images.

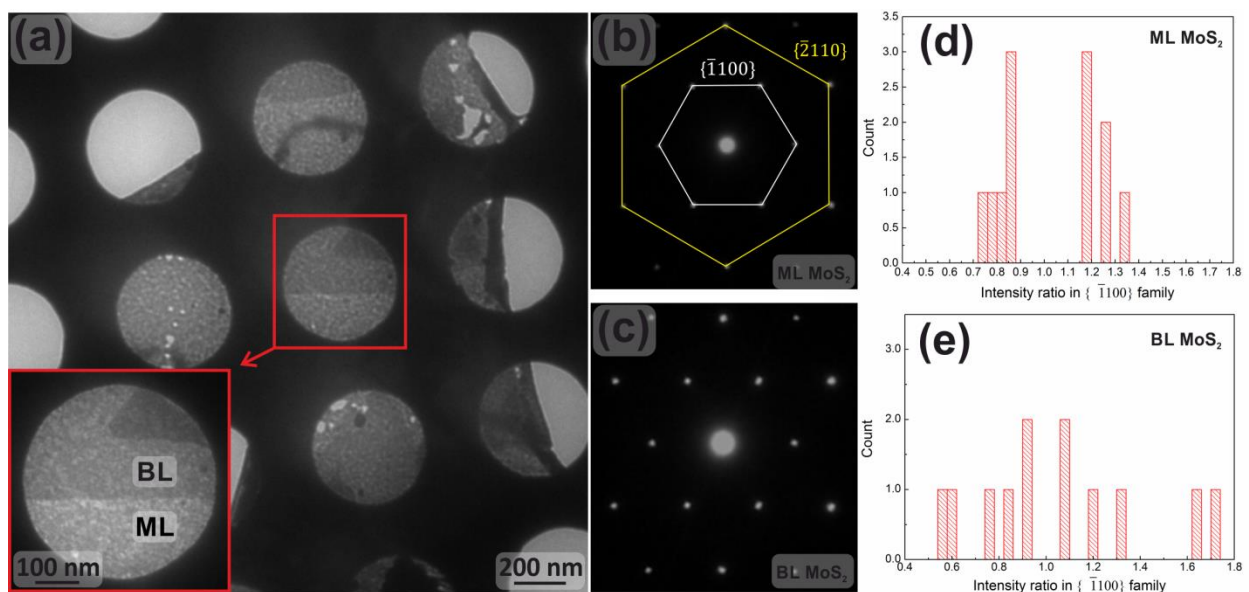

**Supplementary Figure 6.** (a) TEM image of CVD-grown MoS<sub>2</sub> on a holey SiN/Si chip. Inset is a close-up image showing ML and BL MoS<sub>2</sub> in the red square. (b) and (c) are the diffraction patterns for ML and BL MoS<sub>2</sub>. (d,e) Histograms indicating the intensity ratio in the  $\{\bar{1}100\}$  family for ML and BL MoS<sub>2</sub> for several studied sample locations.

## Electron beam-induced nanopores

The MoS<sub>2</sub> GB-NPs shown in the main article have not been created by electron irradiation during the experiment. The formation of NPs under the beam is easily observed during the experiment and is not limited to GBs, as shown in Supplementary Figure 7. Interestingly shear strain maps of beam-induced NPs show that the amount of tensile strain on the sample is reduced during the NP formation while the regions with compressive strain grow. In contrast, the GB-NPs are more tensile strained owing to dislocation cores inducing high levels of strain.

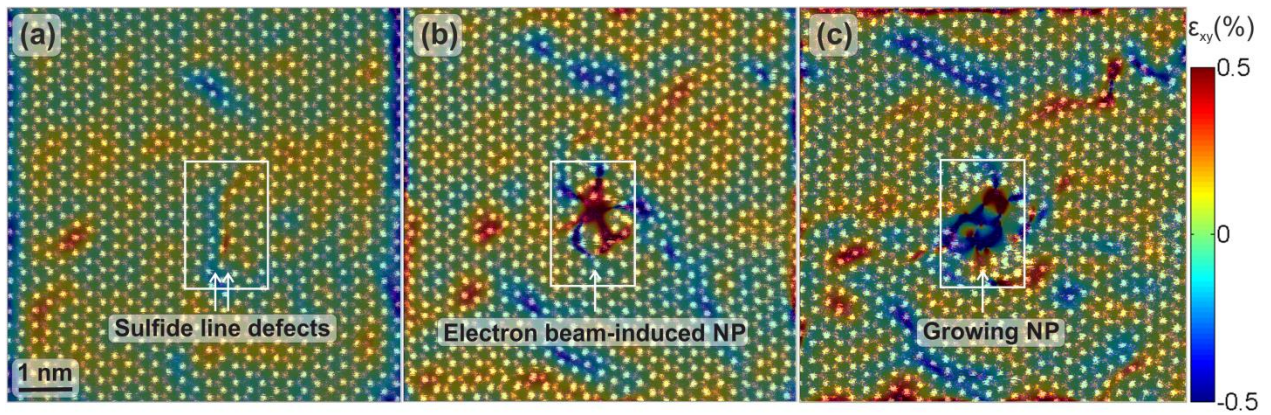

**Supplementary Figure 7.** HAADF-STEM images of MoS<sub>2</sub> with a nanopore induced by the electron beam, superimposed with their shear strain maps. (a) Sulfide line defects created during STEM imaging at 60 kV. (b) Formation of the MoS<sub>2</sub> NP approximately 30 seconds later. (c) Growing MoS<sub>2</sub> NP approximately 50 seconds later. Red and blue correspond to tensile and compressive strain, respectively.



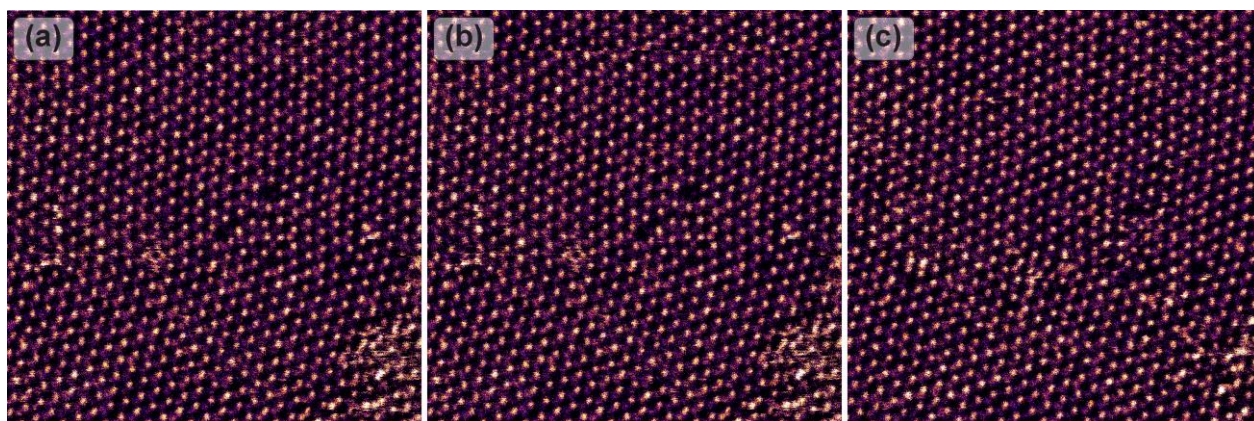

**Supplementary Figure 8.** HAADF-STEM images of MoS<sub>2</sub> grain boundary. (a) First scan. (b) 5 seconds later. (c) 50 seconds later.

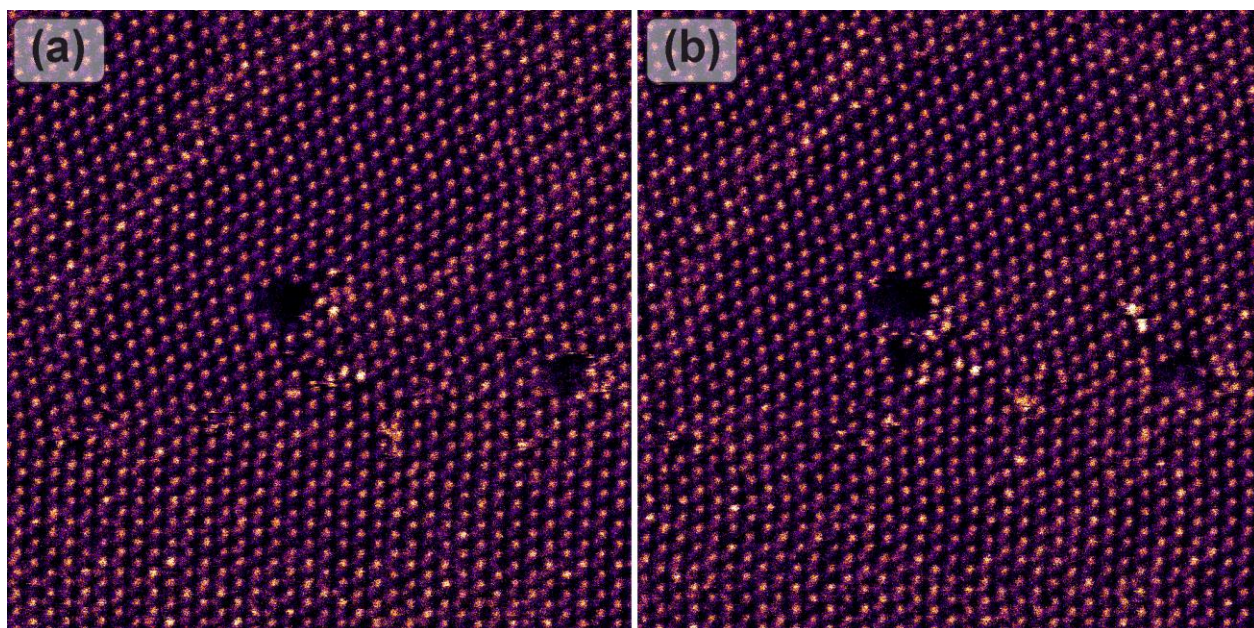

**Supplementary Figure 9.** HAADF-STEM images of MoS<sub>2</sub> grain boundary. (a) first scan. (b) 40 seconds later.

## Theoretical results on the bilayer structure in overlap areas

**Supplementary Table 1.** DFT results for different stacking orders of BL MoS<sub>2</sub>.

| Stacking | Total energy (eV) | Interlayer distance (Å) | Band gap (eV) |
|----------|-------------------|-------------------------|---------------|
| AA       | 22.971            | 6.94                    | 1.24          |
| AB       | 22.926            | 6.52                    | 0.99          |
| AB-AA    | 22.969            | 7.08                    | 1.26          |

## References

References are listed in the main article.
